# Supplementary material for: Cultivation reveals physiological diversity among defensive ‘Streptomyces philanthi’ symbionts of beewolf digger wasps (Hymenoptera, Crabronidae)
Source: PubMed Central journal article supplement (PMC4236554; doi:10.1186/s12866-014-0202-x), 2014-07-29
Supplement: s12866-014-0202-x-S1.pdf [file s12866-014-0202-x-S1.pdf]

**Table S1.** Composed media recipes.

| <b>Component</b>                      | <b>Medium</b> |             |             |
|---------------------------------------|---------------|-------------|-------------|
|                                       | <b>M522</b>   | <b>M252</b> | <b>M225</b> |
| Grace's medium                        | 5*            | 2           | 2           |
| DMEM                                  | 2             | 5           | 2           |
| CMRL                                  | 2             | 2           | 5           |
| Hank's Balanced Salt Solution (Sigma) | 1             | 1           | 1           |
| Insect Medium Supplement (Sigma)      | 1             | 1           | 1           |
| Fetal Bovine Serum (Lonza)            | 1             | 1           | 1           |
| pH                                    | 6.5-6.8       | 7.5-7.8     | 7.5-7.8     |

\* - volume in ml
