# Supplementary material for: Cultivation reveals physiological diversity among defensive ‘Streptomyces philanthi’ symbionts of beewolf digger wasps (Hymenoptera, Crabronidae)
Source: PubMed Central journal article supplement (PMC4236554; doi:10.1186/s12866-014-0202-x), 2014-07-29
Supplement: s12866-014-0202-x-S2.pdf [file s12866-014-0202-x-S2.pdf]

**Table S2.** Composition of commercial cell line media used in this work (amounts in mg/L)

| <b>Amino Acids</b>                                    | <b>Grace's</b> | <b>TC-100</b> | <b>Schneider's</b> | <b>DMEM<br/>21885†</b> | <b>CMRL</b> | <b>Medium<br/>199</b> | <b>RPMI<br/>1640</b> |
|-------------------------------------------------------|----------------|---------------|--------------------|------------------------|-------------|-----------------------|----------------------|
| Glycine                                               | 650            | 650           | 250                | 30                     | 50          | 50                    | 10                   |
| L-Alanine                                             | 225            | 225           | -                  | 862                    | 10          | 25                    | -                    |
| L-Arginine hydrochloride                              | 700            | 700           | 600                | 84                     | 25          | 70                    | 200                  |
| L-Asparagine                                          | 350            | 350           | -                  | -                      | 70          | -                     | 50                   |
| L-Aspartic acid                                       | 350            | 350           | 400                | -                      | 30          | 30                    | 20                   |
| L-Cysteine 2HCl                                       | -              | -             | -                  | -                      | -           | 0.1                   | -                    |
| L-Cystine                                             | 28.68          | 25            | 26.7               | 48                     | 199.88      | 26                    | 65                   |
| L-Glutamic Acid                                       | 600            | 600           | 800                | -                      | 20          | 75                    | 20                   |
| L-Glutamine                                           | 600            | 600           | 1800               | 862                    | 75          | 100                   | 300                  |
| L-Histidine                                           | 2500           | 2500          | 400                | 42                     | 20          | 21.88                 | 15                   |
| L-Isoleucine                                          | 50             | 50            | 150                | 105                    | 20          | 10                    | 50                   |
| L-Hydroxyproline                                      | -              | -             | -                  | -                      | -           | 40                    | 20                   |
| L-Leucine                                             | 75             | 75            | 150                | 105                    | 60          | 60                    | 50                   |
| L-Lysine Hydrochloride                                | 625            | 625           | 2060.8             | 146                    | 70          | 70                    | 40                   |
| L-Methionine                                          | 50             | 50            | 150                | 30                     | 15          | 15                    | 15                   |
| L-Phenylalanine                                       | 150            | 150           | -                  | 66                     | 25          | 25                    | 15                   |
| L-Proline                                             | 350            | 350           | 1700               | -                      | 40          | 40                    | 20                   |
| L-Serine                                              | 550            | 550           | 250                | 42                     | 25          | 25                    | 30                   |
| L-Threonine                                           | 175            | 175           | 350                | 95                     | 30          | 30                    | 20                   |
| L-Tryptophan                                          | 100            | 100           | 100                | 16                     | 10          | 10                    | 5                    |
| L-Tyrosine disodium salt                              | 62.14          | 72            | 720                | 72                     | 40          | 58                    | 29                   |
| L-Valine                                              | 100            | 100           | 300                | 94                     | 25          | 25                    | 20                   |
| beta-Alanine                                          | 200            | -             | 500                | -                      | -           | -                     | -                    |
| <b>Vitamins</b>                                       |                |               |                    |                        |             |                       |                      |
| Ascorbic Acid                                         | -              | -             | -                  | -                      | 50          | 0.05                  | -                    |
| Biotin                                                | 0.01           | 0.01          | 0.08               | -                      | 0.01        | 0.01                  | 0.2                  |
| Choline chloride                                      | 0.2            | 0.2           | 1.60               | 4                      | 0.5         | 0.5                   | 3.0                  |
| D-Calcium pantothenate                                | 0.02           | 0.02          | 0.16               | 4                      | 0.01        | 0.01                  | 0.25                 |
| Folic Acid                                            | 0.02           | 0.02          | 0.16               | 4                      | 0.01        | 0.01                  | 1.0                  |
| i-Inositol                                            | 0.02           | -             | 0.16               | 7.2                    | 0.05        | 0.05                  | 35.0                 |
| Niacinamide                                           | -              | -             | -                  | 4                      | 0.025       | 0.025                 | 1.0                  |
| Nicotinic acid                                        | 0.02           | 0.02          | 0.16               | -                      | 0.025       | 0.025                 | -                    |
| Para-Aminobenzoic Acid                                | 0.02           | 0.02          | 0.16               | -                      | 0.05        | 0.05                  | 1.0                  |
| Pyridoxal hydrochloride                               | -              | -             | -                  | -                      | -           | 0.025                 | 1.0                  |
| Pyridoxine HCl                                        | 0.02           | 0.02          | 0.16               | 4                      | 0.025       | 0.025                 | -                    |
| Riboflavin                                            | 0.02           | 0.02          | 0.16               | 0.4                    | 0.01        | 0.01                  | 0.2                  |
| Thiamine hydrochloride                                | 0.02           | 0.02          | 0.16               | 4                      | 0.01        | 0.01                  | 1.0                  |
| Vitamin A                                             | -              | -             | -                  | -                      | -           | 0.1                   | -                    |
| Alpha-tocopherol Phosphate                            | -              | -             | -                  | -                      | -           | 0.01                  | -                    |
| Menadione                                             | -              | -             | -                  | -                      | -           | 0.01                  | -                    |
| Calciferol                                            | -              | -             | -                  | -                      | -           | 0.1                   | -                    |
| Cobalamin                                             | -              | -             | -                  | -                      | -           | -                     | 0.0050               |
| <b>Inorganic salts</b>                                |                |               |                    |                        |             |                       |                      |
| Fe(NO <sub>3</sub> ) <sub>3</sub> * 9H <sub>2</sub> O | -              | -             | -                  | 0,1                    | -           | 0.7                   | -                    |
| Ca(NO <sub>3</sub> ) <sub>2</sub> * 4H <sub>2</sub> O | -              | -             | -                  | -                      | -           | -                     | 100.0                |

|                                                     |       |       |      |       |      |       |        |
|-----------------------------------------------------|-------|-------|------|-------|------|-------|--------|
| CaCl <sub>2</sub>                                   | 500   | 9966  | -    | 264   | 264  | 200   | -      |
| MgCl <sub>2</sub>                                   | 1070  | 1068  | 1807 | -     | -    | -     | -      |
| MgSO <sub>4</sub>                                   | 1358  | 1358  | -    | 200   | 200  | 97.67 | 48.84  |
| KCl                                                 | 2800  | 2870  | 1600 | 400   | 400  | 400   | 400.0  |
| KH <sub>2</sub> PO <sub>4</sub>                     | -     | -     | 450  | -     | -    | -     | -      |
| NaHCO <sub>3</sub>                                  | 350   | 350   | -    | 3700  | 2200 | 2200  | 2000.0 |
| NaCl                                                | -     | -     | 2100 | 6400  | 6799 | 6800  | 6000.0 |
| Na <sub>2</sub> HPO <sub>4</sub>                    | -     | -     | 700  | -     | -    | -     | 800.0  |
| NaH <sub>2</sub> PO <sub>4</sub> * H <sub>2</sub> O | 1013  | 876,9 | -    | 154   | 158  | 140   | -      |
| <b>Reducing Agents</b>                              |       |       |      |       |      |       |        |
| Glutathione, monosodium                             | -     | -     | -    | -     | 10   | 0.05  | 1.0    |
| <b>Carbon sources</b>                               |       |       |      |       |      |       |        |
| D-Glucose (Dextrose)                                | 700   | 1000  | 2000 | 1000  | 1000 | 1000  | 2000   |
| D-Fructose                                          | 400   | -     | -    | -     | -    | -     | -      |
| Sucrose                                             | 26680 | -     | -    | -     | -    | -     | -      |
| Ribose                                              | -     | -     | -    | -     | -    | 0.5   | -      |
| Alpha-Ketoglutaric acid                             | 370   | -     | 350  | -     | -    | -     | -      |
| Fumaric acid                                        | 55    | -     | 60   | -     | -    | -     | -      |
| Malic acid                                          | 670   | -     | 600  | -     | -    | -     | -      |
| Succinic acid                                       | 60    | -     | 60   | -     | -    | -     | -      |
| Trehalose                                           | -     | -     | 2000 | -     | -    | -     | -      |
| Yeastolate                                          | 3330  | -     | -    | -     | -    | -     | -      |
| Lactalbumin hydrolysate                             | 3303  | -     | -    | -     | -    | -     | -      |
| Yeast extract                                       | -     | -     | 2000 | -     | -    | -     | -      |
| Pyruvic acid                                        | -     | -     | -    | 110   | -    | -     | -      |
| Ethanolamine                                        | -     | -     | -    | 1.9   | -    | -     | -      |
| Tryptose broth                                      | -     | 2600  | -    | -     | -    | -     | -      |
| <b>Other compaunds</b>                              |       |       |      |       |      |       |        |
| 2-deoxy-D-ribose                                    | -     | -     | -    | -     | -    | 0.5   | -      |
| Adenine sulfate                                     | -     | -     | -    | -     | -    | 10    | -      |
| Adenosine 5'-phosphate                              | -     | -     | -    | -     | -    | 0.2   | -      |
| Adenosine 5'-triphosphate                           | -     | -     | -    | -     | -    | 1     | -      |
| 2'Deoxyadenosine                                    | -     | -     | -    | -     | 10   | -     | -      |
| 2'Deoxyctidine                                      | -     | -     | -    | -     | 10   | -     | -      |
| 2'Deoxyguanosine                                    | -     | -     | -    | -     | 10   | -     | -      |
| 5-Methyl-deoxycytidine                              | -     | -     | -    | -     | 0.1  | -     | -      |
| Guanine hydrochloride                               | -     | -     | -    | -     | -    | 0.3   | -      |
| Thymine                                             | -     | -     | -    | -     | -    | 0.3   | -      |
| Thymidine                                           | -     | -     | -    | 0.365 | 10   | -     | -      |
| Uracil                                              | -     | -     | -    | -     | -    | 0.3   | -      |
| Co-carboxylase                                      | -     | -     | -    | -     | 1    | -     | -      |
| Coenzyme A                                          | -     | -     | -    | -     | 2.5  | -     | -      |
| Hypoxanthine Na                                     | -     | -     | -    | -     | -    | 0.4   | -      |
| NAD                                                 | -     | -     | -    | -     | 7    | -     | -      |
| FAD                                                 | -     | -     | -    | -     | 1    | -     | -      |
| NADP                                                | -     | -     | -    | -     | 1    | -     | -      |
| Uridine 5'- triphosphate                            | -     | -     | -    | -     | 1    | -     | -      |
| Cholesterol                                         | -     | -     | -    | -     | -    | 0.2   | -      |
| Phenol Red                                          | -     | -     | -    | 15    | 20   | 20    | 5      |

|                                     |   |   |   |   |     |    |   |
|-------------------------------------|---|---|---|---|-----|----|---|
| Sodium acetate-3H <sub>2</sub> O    | - | - | - | - | 83  | 50 | - |
| Sodium glucuronate-H <sub>2</sub> O | - | - | - | - | 4.2 | -  | - |
| Tween 80 <sup>®</sup>               | - | - | - | - | 5   | 20 | - |

---
