# Supplementary material for: Cultivation reveals physiological diversity among defensive ‘Streptomyces philanthi’ symbionts of beewolf digger wasps (Hymenoptera, Crabronidae)
Source: PubMed Central journal article supplement (PMC4236554; doi:10.1186/s12866-014-0202-x), 2014-07-29
Supplement: s12866-014-0202-x-S3.pdf [file s12866-014-0202-x-S3.pdf]

**Table S3.** Number of '*S. philanthi*' CFUs isolated from different females' antennal samples.

| Geographic origin         | Host species                         | Number of specimens        |                            |                                         | Symbionts,<br>CFU/specimen<br>(mean $\pm$ SE) |
|---------------------------|--------------------------------------|----------------------------|----------------------------|-----------------------------------------|-----------------------------------------------|
|                           |                                      | Total                      | with symbionts<br>isolated | with opportunistic<br>bacteria isolated |                                               |
| Europe                    | <i>Philanthus triangulum</i>         | 7                          | 3                          | 1                                       | $\sim 10^4$ †                                 |
| South Africa              | <i>Philanthus triangulum diadema</i> | 11                         | 11                         | 0                                       | $\sim 10^5$ †                                 |
|                           | <i>Philanthus histrio</i>            | 4                          | 1                          | 0                                       | $14 \cdot 10^4$                               |
|                           | <i>Philanthus loefflingi</i>         | 2                          | 1                          | 0                                       | $2 \cdot 10^4$                                |
|                           | <i>Philanthus fuscipennis</i>        | 3                          | 2                          | 1                                       | $22 \pm 20$                                   |
|                           | <i>Philanthus capensis</i>           | 1                          | 0                          | 1                                       | 0                                             |
| USA                       | <i>Philanthus albopilosus</i>        | 2                          | 1                          | 1                                       | $70 \cdot 10^3$                               |
|                           | <i>Philanthus barbiger</i>           | 2                          | 1                          | 1                                       | $15 \cdot 10^4$                               |
|                           | <i>Philanthus bicinctus</i>          | 5                          | 5                          | 0                                       | $50 \cdot 10^3 \pm 14 \cdot 10^3$             |
|                           | <i>Philanthus bilunatus</i>          | 3                          | 3                          | 0                                       | $28 \cdot 10^3 \pm 13 \cdot 10^3$             |
|                           | <i>Philanthus crabroniformis</i>     | 1                          | 1                          | 0                                       | NA                                            |
|                           | <i>Philanthus gibbosus</i>           | 3                          | 3                          | 0                                       | $76 \cdot 10^3 \pm 39 \cdot 10^3$             |
|                           | <i>Philanthus multimaculatus</i>     | 4                          | 4                          | 0                                       | $43 \cdot 10^3 \pm 96 \cdot 10^2$             |
|                           | <i>Philanthus pacificus</i>          | 1                          | 1                          | 0                                       | 2                                             |
|                           | <i>Philanthus parkeri</i>            | 1                          | 1                          | 0                                       | $63 \cdot 10^3$                               |
|                           | <i>Philanthus politus</i>            | 1                          | 1                          | 0                                       | $72 \cdot 10^3$                               |
|                           | <i>Philanthus psyche</i>             | 4                          | 4                          | 0                                       | $38 \cdot 10^3 \pm 21 \cdot 10^3$             |
|                           | <i>Philanthus pulcher</i>            | 4                          | 4                          | 0                                       | $680 \pm 447$                                 |
|                           | <i>Philanthus ventilabris</i>        | 7                          | 6                          | 1                                       | $30 \cdot 10^3 \pm 23 \cdot 10^3$             |
|                           | <i>Philanthus zebratus</i>           | 1                          | 1                          | 0                                       | $1 \cdot 10^4$                                |
|                           | Brasil                               | <i>Trachypus elongatus</i> | 1                          | 1                                       | 0                                             |
| <i>Trachypus flavidus</i> |                                      | 3                          | 1                          | 0                                       | NA †                                          |
| Turkey                    | <i>Philanthinus</i>                  | 16                         | 7                          | 2                                       | $77 \pm 34$                                   |
|                           | <i>quattuordecimpunctatus</i>        |                            |                            |                                         |                                               |

NA – not assessed; † - difficult to count because micro-colonies are fuzzy and poorly structured.
