# Supplementary material for: Cultivation reveals physiological diversity among defensive ‘Streptomyces philanthi’ symbionts of beewolf digger wasps (Hymenoptera, Crabronidae)
Source: PubMed Central journal article supplement (PMC4236554; doi:10.1186/s12866-014-0202-x), 2014-07-29
Supplement: s12866-014-0202-x-S4.pdf [file s12866-014-0202-x-S4.pdf]

**Table S4:** Accession numbers of actinobacterial sequences included in the phylogenetic analyses shown in Fig. 3.

| Genus                    | Species                                          | Strain     | 16S             | gyrB            | gyrA         |
|--------------------------|--------------------------------------------------|------------|-----------------|-----------------|--------------|
| <i>Frankia</i>           | <i>alni</i>                                      | ACN14a     | NC_008278       | NC_008278       | NC_008278    |
| <i>Streptomyces</i>      | <i>abikoensis</i> (=luteovercillatus)            | DSM40831   | KC954556        | KC954562        | KC954559     |
| <i>Streptomyces</i>      | <i>albus</i>                                     | J1074      | AJ621602(1)     | NZ_DS999645     | NZ_DS999645  |
| <i>Streptomyces</i>      | <i>auratus</i>                                   | AGR0001    | -               | NZ_JH725387     | NZ_JH725387  |
| <i>Streptomyces</i>      | <i>avermitilis</i>                               | MA4680     | NC_003155       | NC_003155       | NC_003155    |
| <i>Streptomyces</i>      | <i>bingchenggensis</i>                           | BCW1       | NC_016582       | NC_016582       | NC_016582    |
| <i>Streptomyces</i>      | <i>cattleya</i>                                  | NRRL8057   | NC_016111       | NC_016111       | NC_016111    |
| <i>Streptomyces</i>      | <i>clavuligerus</i>                              | ATCC 27064 | NZ_CM001015     | NZ_CM001015     | NZ_CM001015  |
| <i>Streptomyces</i>      | <i>coelicolor</i>                                | A3(2)      | NC_003888       | NC_003888       | NC_003888    |
| <i>Streptomyces</i>      | <i>flavogriseus</i>                              | ATCC 33331 | NC_016114       | NC_016114       | NC_016114    |
| <i>Streptomyces</i>      | <i>ghanaensis</i>                                | ATCC 14672 | AJ781384(1)     | NZ_DS999641     | NZ_DS999641  |
| <i>Streptomyces</i>      | <i>griseoflavus</i>                              | Tu4000     | AJ781322(1)     | NZ_GG657758     | NZ_GG657758  |
| <i>Streptomyces</i>      | <i>griseus</i> subsp. <i>griseus</i>             | NBRC 13350 | NC_010572       | NC_010572       | NC_010572    |
| <i>Streptomyces</i>      | <i>griseus</i>                                   | XylebKG1   | NZ_GL877172     | NZ_GL877172     | NZ_GL877172  |
| <i>Streptomyces</i>      | <i>hygroscopicus</i> subsp. <i>jinggangensis</i> | 5008       | NC_017765       | NC_017765       | NC_017765    |
| <i>Streptomyces</i>      | <i>hygroscopicus</i>                             | ATCC 53653 | EF408736        | NZ_ACEx01000401 | ACEx01000401 |
| <i>Streptomyces</i>      | <i>lividans</i>                                  | TK24       | AY039029        | NZ_GG657756     | NZ_GG657756  |
| <i>Streptomyces</i>      | <i>mutabilis</i>                                 | DSM40169   | KC954557        | KC954563        | KC954560     |
| <i>Streptomyces</i>      | <i>pristinaespiralis</i>                         | ATCC 25486 | -               | NZ_CM000950     | NZ_CM000950  |
| <i>Streptomyces</i>      | <i>ramulosus</i>                                 | DSM40100   | KC954558        | KC954564        | KC954561     |
| <i>Streptomyces</i>      | <i>roseosporus</i>                               | NRRL11379  | NZ_ABYX01000136 | NZ_ABYX01000145 | ABYX01000145 |
| <i>Streptomyces</i>      | <i>scabiei</i>                                   | 87.22      | NC_013929       | NC_013929       | NC_013929    |
| <i>Streptomyces</i>      | <i>sp.</i>                                       | SPB78      | -               | NZ_GG657742     | NZ_GG657742  |
| <i>Streptomyces</i>      | <i>sp.</i>                                       | SPB74      | -               | NZ_GG770539     | NZ_GG770539  |
| <i>Streptomyces</i>      | <i>sp.</i>                                       | SirexAAE   | NC_015953       | NC_015953       | NC_015953    |
| <i>Streptomyces</i>      | <i>sp.</i>                                       | Tu6071     | NZ_CM001165     | NZ_CM001165     | NZ_CM001165  |
| <i>Streptomyces</i>      | <i>sp.</i>                                       | C          | -               | NZ_ACEW01000329 | ACEW01000329 |
| <i>Streptomyces</i>      | <i>sp.</i>                                       | Mg1        | -               | NZ_ABJF01000426 | ABJF01000426 |
| <i>Streptomyces</i>      | <i>sviceus</i>                                   | ATCC 29083 | AB184559(1)     | NZ_CM000951     | NZ_CM000951  |
| <i>Streptomyces</i>      | <i>venezuelae</i>                                | ATCC 10712 | NC_018750       | NC_018750       | NC_018750    |
| <i>Streptomyces</i>      | <i>violaceusniger</i>                            | Tu4113     | NC_015957       | NC_015957       | NC_015957    |
| <i>Streptomyces</i>      | <i>viridochromogenes</i>                         | DSM40736   | AB045858(1)     | NZ_ACEZ01000135 | ACEZ01000135 |
| <i>Streptosporangium</i> | <i>roseum</i>                                    | DSM 43021  | NC_013595       | NC_013595       | NC_013595    |
