# Supplementary material for: Cultivation reveals physiological diversity among defensive ‘Streptomyces philanthi’ symbionts of beewolf digger wasps (Hymenoptera, Crabronidae)
Source: PubMed Central journal article supplement (PMC4236554; doi:10.1186/s12866-014-0202-x), 2014-07-29
Supplement: s12866-014-0202-x-S6.pdf [file s12866-014-0202-x-S6.pdf]

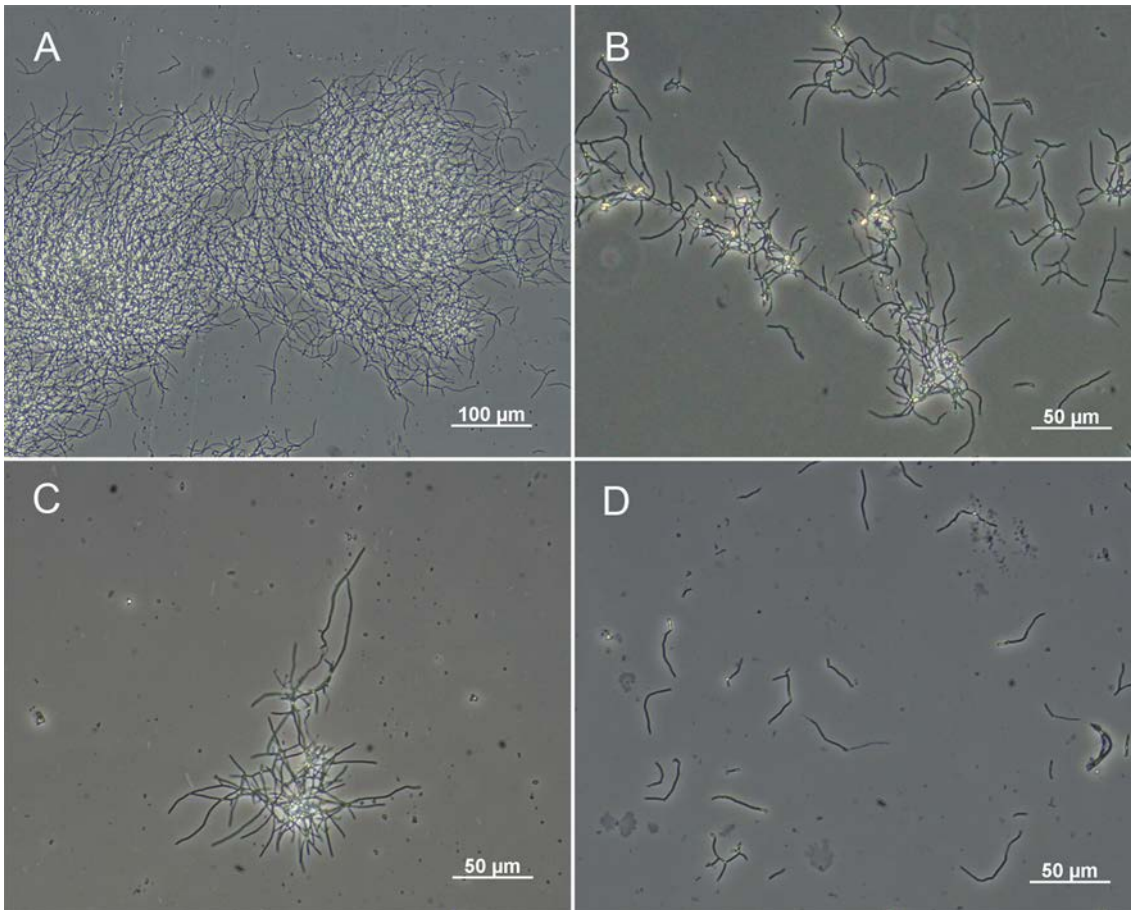

**Figure S2. Polymorphism of *S. philanthi* biovars *'elongatus'* and *'loefflingi'*.** Strains elo217 (A, B) and loe163 (C, D) (biovars *'elongatus'* and *'loefflingi'*, respectively) were grown in Grace's liquid medium with 10% FBS. Bacteria of biovar *'elongatus'* formed mycelium and typical micro-colonies in early stage of logarithmic growth (A) but tend to fall apart in late stage of logarithmic growth or in stationary phase (B). Bacteria of biovar *'loefflingi'* could form micro-colonies (C) and also grow as short almost unbranched cells typical for the "antennal" phenotype (D).
