# Supplementary material for: Cultivation reveals physiological diversity among defensive ‘Streptomyces philanthi’ symbionts of beewolf digger wasps (Hymenoptera, Crabronidae)
Source: PubMed Central journal article supplement (PMC4236554; doi:10.1186/s12866-014-0202-x), 2014-07-29
Supplement: s12866-014-0202-x-S8.pdf [file s12866-014-0202-x-S8.pdf]

**Table S5.** Primers and adapters used for generation of AFLP markers.

| <b>Primers/adapters</b>                | <b>Sequence (5'--&gt; 3')</b> | <b>5'-Mod.</b> |
|----------------------------------------|-------------------------------|----------------|
| <i>Adapters</i>                        |                               |                |
| Apal_fwd                               | TCGTAGACTGCGTACAGGCC          |                |
| Apal_rev                               | TGTACGCAGTCTAC                |                |
| TaqI_fwd                               | GACGATGAGTCCTGAC              |                |
| TaqI_rev                               | CGGTCAGGACTCAT                |                |
| <i>Preamplification primers</i>        |                               |                |
| Apal                                   | GACTGCGTACAGGCC               |                |
| TaqI                                   | GATGAGTCCTGACCGA              |                |
| <i>Selective amplification primers</i> |                               |                |
| TaqI-G_IR700                           | GATGAGTCCTGACCGAG             | IRD700         |
| TaqI-C_IR800                           | GATGAGTCCTGACCGAC             | IRD800         |
| Apal-CA                                | GACTGCGTACAGGCCCA             |                |
| Apal-CC                                | GACTGCGTACAGGCCCC             |                |
| Apal-CG                                | GACTGCGTACAGGCCCCG            |                |
| Apal-CT                                | GACTGCGTACAGGCCCT             |                |
| Apal-GA                                | GACTGCGTACAGGCCGA             |                |
| Apal-GC                                | GACTGCGTACAGGCCGC             |                |
| Apal-GG                                | GACTGCGTACAGGCCGG             |                |
| Apal-GT                                | GACTGCGTACAGGCCGT             |                |
| Apal-AA                                | GACTGCGTACAGGCCAA             |                |
| Apal-AC                                | GACTGCGTACAGGCCAC             |                |
